# Supplementary material for: Nutrients Intake in Individuals with Hypertension, Dyslipidemia, and Diabetes: An Italian Survey
Source: MDPI journal article supplement (doi:10.3390/nu12040923), 2020-03-27

**Table 1S.** Characteristics of men and women receiving and not receiving treatment for hypertension. Men and women aged 35-79 years from Osservatorio Epidemiologico Cardiovascolare/Health Examination Survey of the CUORE Project 2008-2012.

|                              | MEN                             |      |          |      |                          |      |          |      |       | WOMEN                           |      |          |      |                          |      |          |      |       |
|------------------------------|---------------------------------|------|----------|------|--------------------------|------|----------|------|-------|---------------------------------|------|----------|------|--------------------------|------|----------|------|-------|
|                              | Not treated<br>for hypertension |      |          |      | Treated for hypertension |      |          |      |       | Not treated<br>for hypertension |      |          |      | Treated for hypertension |      |          |      |       |
|                              | n                               | %    | 95% C.I. |      | n                        | %    | 95% C.I. |      | Sign. | n                               | %    | 95% C.I. |      | n                        | %    | 95% C.I. |      | Sign. |
| <b>Smoking Habit</b>         | 2672                            | 25.8 | 24.2     | 27.5 | 1249                     | 20.5 | 18.2     | 22.7 | **    | 2770                            | 21.9 | 20.4     | 23.5 | 1155                     | 23.1 | 20.6     | 25.5 | ns    |
| <b>Physical Inactivity</b>   | 2745                            | 30.8 | 29.1     | 32.6 | 1280                     | 37.3 | 34.7     | 40.0 | **    | 2832                            | 41.3 | 39.5     | 43.1 | 1171                     | 45.1 | 42.3     | 48.0 | ns    |
| <b>Low Education</b>         | 2731                            | 44.5 | 42.6     | 46.3 | 1268                     | 49.3 | 46.5     | 52.0 | *     | 2820                            | 44.7 | 42.9     | 46.6 | 1147                     | 60.4 | 57.6     | 63.3 | ***   |
| <b>Overweight or Obesity</b> | 2749                            | 69.1 | 67.4     | 70.8 | 1280                     | 85.9 | 84.0     | 87.8 | ***   | 2837                            | 52.8 | 50.9     | 54.6 | 1174                     | 76.6 | 74.2     | 79.0 | ***   |

Smoking Habit: smoking one or more cigarettes per day . Physical Inactivity: usually reading, watching television, going to the movies or spending leisure time in other sedentary activities. Low Education: primary or middle school. Overweight or Obesity: BMI >25.0 kg/m<sup>2</sup>. C.I. = Confidence Interval. Sign: statistical significance of chi-squares to compare treated and not treated groups; \*\*\* p<0.0001; \*\* p<0.01; \* p<=0.05; ns not statistically significant. Data are standardized by age using the 2013 European population.

**Table 2S.** Characteristics of men and women receiving and not receiving treatment for hypcholesteromia. Men and women aged 35-79 years from Osservatorio Epidemiologico Cardiovascolare/Health Examination Survey of the CUORE Project 2008-2012.

|                              | MEN                             |      |          |      |                             |      |          |      |       | WOMEN                           |      |          |      |                             |      |          |      |       |
|------------------------------|---------------------------------|------|----------|------|-----------------------------|------|----------|------|-------|---------------------------------|------|----------|------|-----------------------------|------|----------|------|-------|
|                              | Not treated<br>for dyslipidemia |      |          |      | Treated<br>for dyslipidemia |      |          |      |       | Not treated<br>for dyslipidemia |      |          |      | Treated<br>for dyslipidemia |      |          |      |       |
|                              | n                               | %    | 95% C.I. |      | n                           | %    | 95% C.I. |      | Sign. | n                               | %    | 95% C.I. |      | n                           | %    | 95% C.I. |      | Sign. |
| <b>Smoking Habit</b>         | 3360                            | 25.1 | 23.6     | 26.6 | 528                         | 27.8 | 24.0     | 31.6 | ns    | 3378                            | 21.4 | 20.0     | 22.8 | 530                         | 22.6 | 19.0     | 26.2 | ns    |
| <b>Physical Inactivity</b>   | 3451                            | 31.2 | 29.7     | 32.8 | 540                         | 39.5 | 35.4     | 43.6 | **    | 3452                            | 42.8 | 41.1     | 44.4 | 536                         | 51.8 | 47.6     | 56.1 | **    |
| <b>Low Education</b>         | 3435                            | 44.0 | 42.4     | 45.7 | 533                         | 49.8 | 45.5     | 54.0 | ns    | 3424                            | 46.9 | 45.2     | 48.5 | 526                         | 51.2 | 47.0     | 55.5 | ns    |
| <b>Overweight or Obesity</b> | 3455                            | 72.1 | 70.6     | 73.6 | 540                         | 77.8 | 74.3     | 81.3 | ns    | 3456                            | 56.2 | 54.6     | 57.9 | 537                         | 67.8 | 63.8     | 71.8 | ***   |

Smoking Habit: smoking one or more cigarettes per day . Physical Inactivity: usually reading, watching television, going to the movies or spending leisure time in other sedentary activities. Low Education: primary or middle school. Overweight or Obesity: BMI >25.0 kg/m<sup>2</sup>. C.I. = Confidence Interval. Sign: statistical significance of chi-squares to compare treated and not treated groups; \*\*\* p<0.0001; \*\* p<0.01; \* p<=0.05; ns not statistically significant. Data are standardized by age using the 2013 European population.

**Table 3S.** Characteristics of men and women receiving and not receiving treatment for diabetes. Men and women aged 35-79 years from Osservatorio Epidemiologico Cardiovascolare/Health Examination Survey of the CUORE Project 2008-2012.

|                              | MEN                         |      |          |      |     |                         |          |      |       |      | WOMEN                       |          |      |     |                         |          |      |       |
|------------------------------|-----------------------------|------|----------|------|-----|-------------------------|----------|------|-------|------|-----------------------------|----------|------|-----|-------------------------|----------|------|-------|
|                              | Not treated<br>for diabetes |      |          |      |     | Treated<br>for diabetes |          |      |       |      | Not treated<br>for diabetes |          |      |     | Treated<br>for diabetes |          |      |       |
|                              | n                           | %    | 95% C.I. |      | n   | %                       | 95% C.I. |      | Sign. | n    | %                           | 95% C.I. |      | n   | %                       | 95% C.I. |      | Sign. |
| <b>Smoking Habit</b>         | 3627                        | 25.2 | 23.8     | 26.6 | 298 | 24.1                    | 19.2     | 28.9 | ns    | 3736 | 21.3                        | 20.0     | 22.6 | 192 | 19.7                    | 14.1     | 25.3 | ns    |
| <b>Physical Inactivity</b>   | 3721                        | 31.4 | 29.9     | 32.9 | 308 | 39.6                    | 34.1     | 45.0 | *     | 3813 | 42.1                        | 40.5     | 43.6 | 193 | 55.8                    | 48.8     | 62.8 | **    |
| <b>Low Education</b>         | 3699                        | 43.7 | 42.1     | 45.2 | 305 | 64.0                    | 58.7     | 69.4 | ***   | 3783 | 46.6                        | 45.0     | 48.2 | 187 | 63.8                    | 56.9     | 70.7 | ***   |
| <b>Overweight or Obesity</b> | 3725                        | 72.0 | 70.6     | 73.4 | 308 | 83.3                    | 79.1     | 87.4 | **    | 3820 | 56.6                        | 55.0     | 58.2 | 194 | 79.0                    | 73.2     | 84.7 | ***   |

Smoking Habit: smoking one or more cigarettes per day . Physical Inactivity: usually reading, watching television, going to the movies or spending leisure time in other sedentary activities. Low Education: primary or middle school. Overweight or Obesity: BMI >25.0 kg/m<sup>2</sup>. C.I. = Confidence Interval. Sign: statistical significance of chi-squares to compare treated and not treated groups; \*\*\* p<0.0001; \*\* p<0.01; \* p<=0.05; ns not statistically significant. Data are standardized by age using the 2013 European population.

**Figure 1S.** Distribution of Total energy intake (Kcal/day) in men and women receiving and not receiving hypertension treatment. Men and women aged 35-79 years from Osservatorio Epidemiologico Cardiovascolare/Health Examination Survey of the CUORE Project 2008-2012.

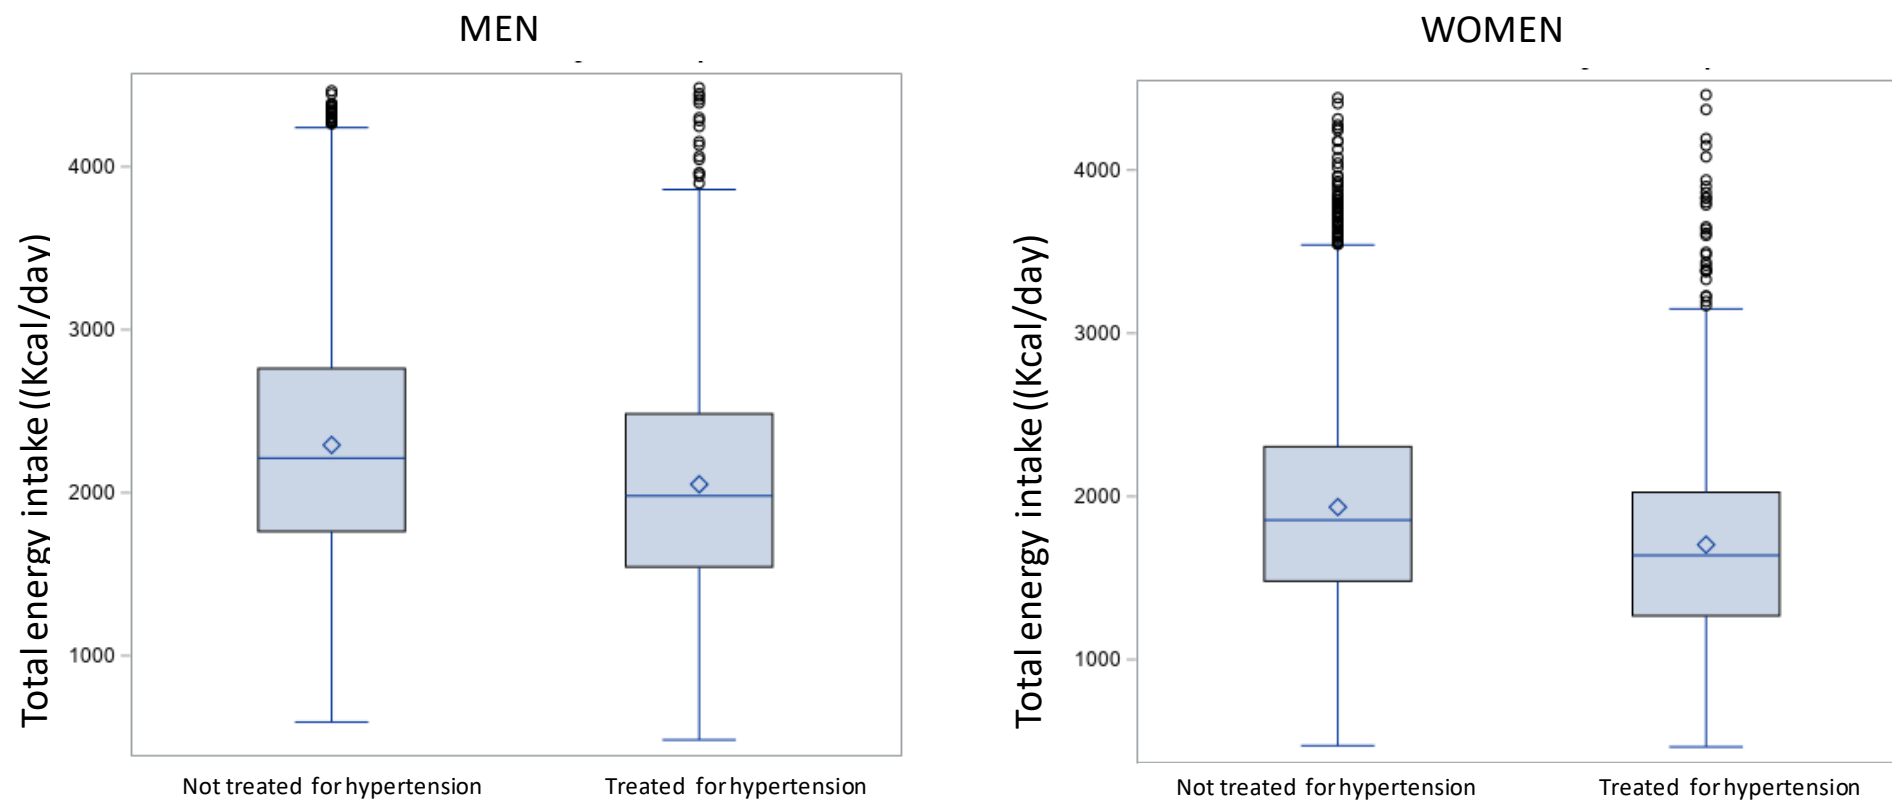

**Figure 2S.** Distribution of Total energy intake (Kcal/day) in men and women receiving and not receiving hypercholesterolemia treatment. Men and women aged 35-79 years from Osservatorio Epidemiologico Cardiovascolare/Health Examination Survey of the CUORE Project 2008-2012.

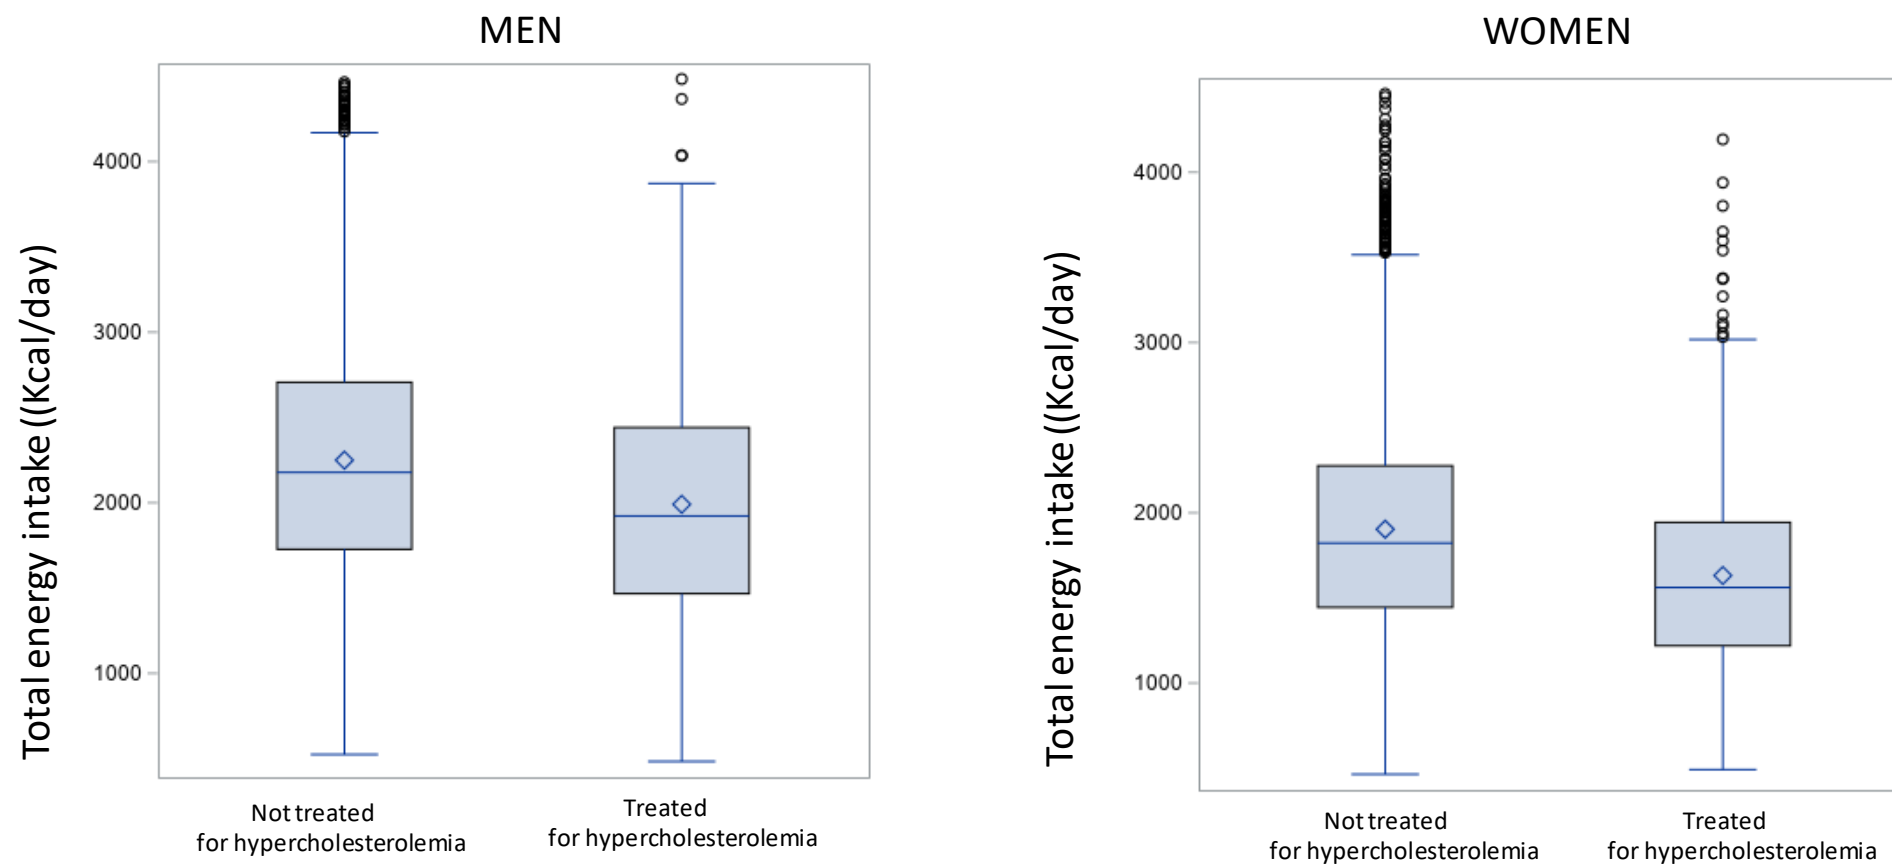

**Figure 3S.** Distribution of Total energy intake (Kcal/day) in men and women receiving and not receiving diabetes treatment. Men and women aged 35-79 years from Osservatorio Epidemiologico Cardiovascolare/Health Examination Survey of the CUORE Project 2008-2012.

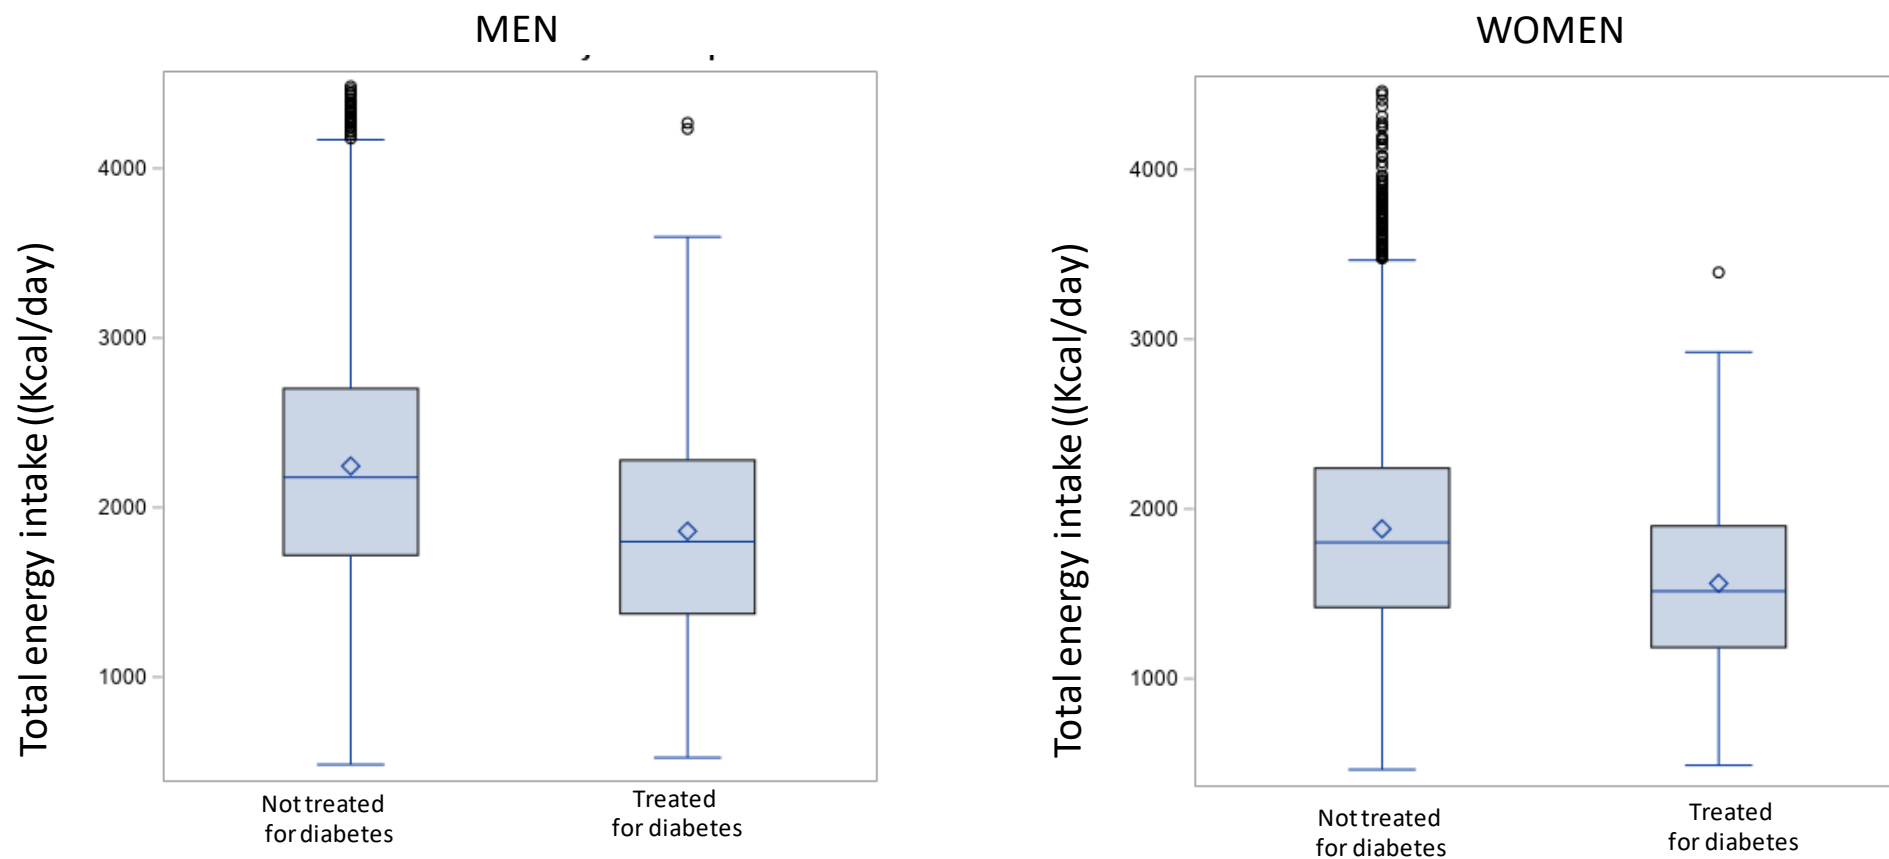

Supplement: s1 [file s1]
